# Supplementary material
Source: PubMed Central journal article supplement (PMC2393786)
Supplement: pnas_0712324105_1.pdf [file pnas_0712324105_1.pdf]

**A****Chromosome 1**

11.19Mb

11.20Mb

11.21Mb

11.22Mb

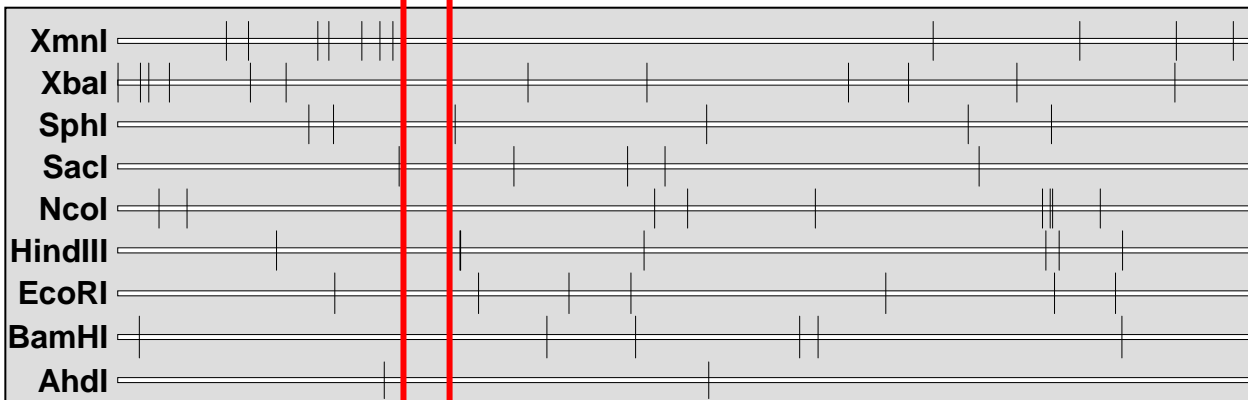**Exon 34****Exon 35**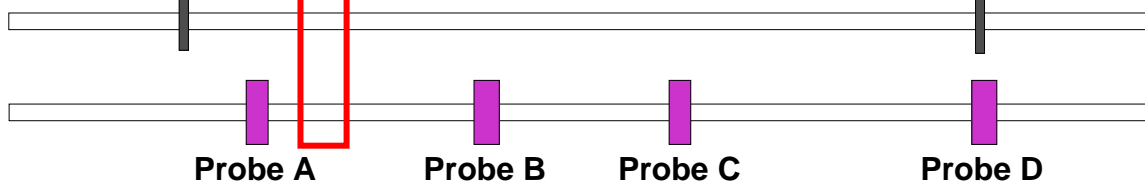**B**

Primers for generation of probe A (touchdown PCR):

F = 5'-GCAAATGGGTGTTCAAGGTTCCAGAAGG-3'

R = 5'-TTTCCCACCCACATTAAACTGTGTAACCTG-3'

Primers for PCR-genotyping P-Rex2:

Targeted allele

F = 5'-TCACTGAAGCGGGAAGGGACTGGCTGC-3'

R = 5'-GTTTCAGGTTTCAGGGGGAGGTGTGGGAGG-3'

Wt allele

F = 5'-GATGCACTTTCAAAGGGCCTAGTCCTGCC-3'

R = 5'-CCCCTGGTCTTGGTTAATGATGGGTGTCC-3'
