# Supplementary material
Source: PubMed Central journal article supplement (PMC2393786)

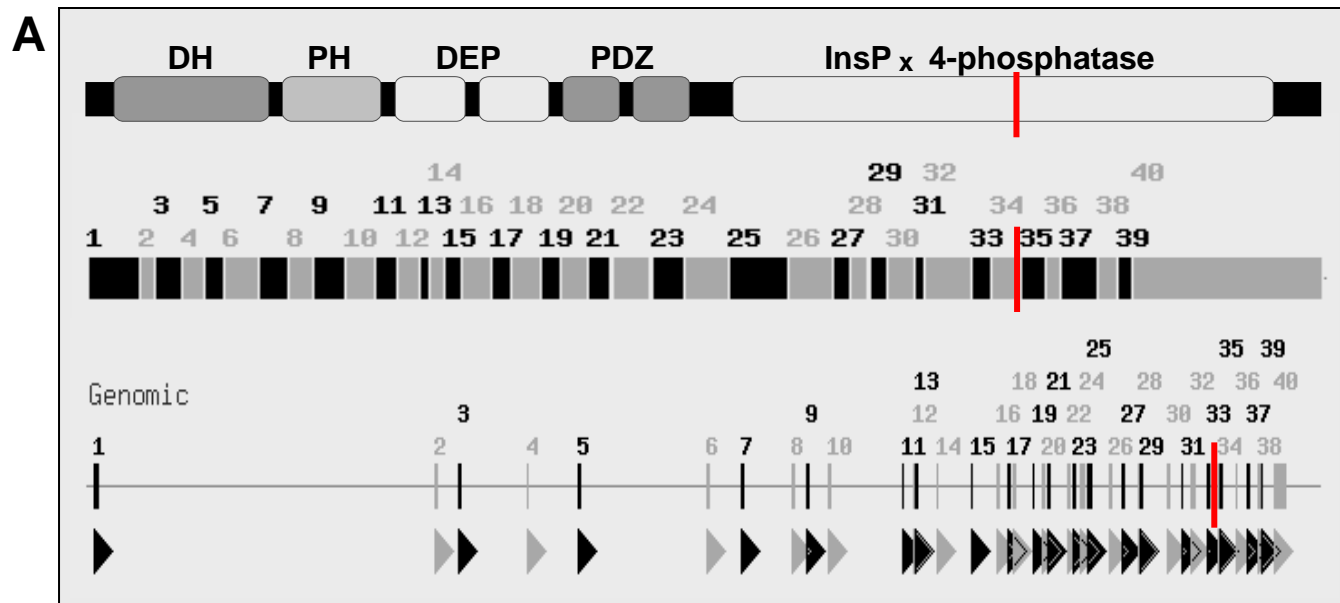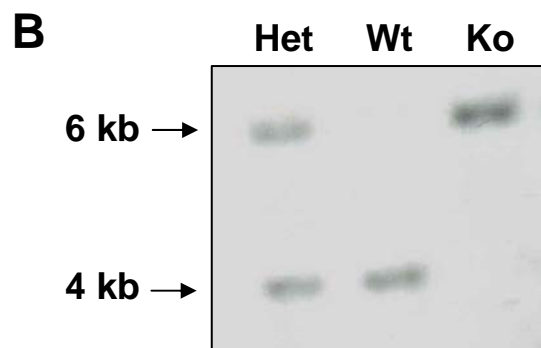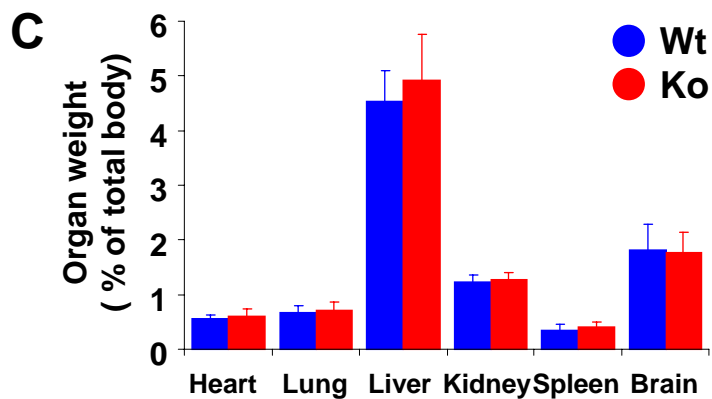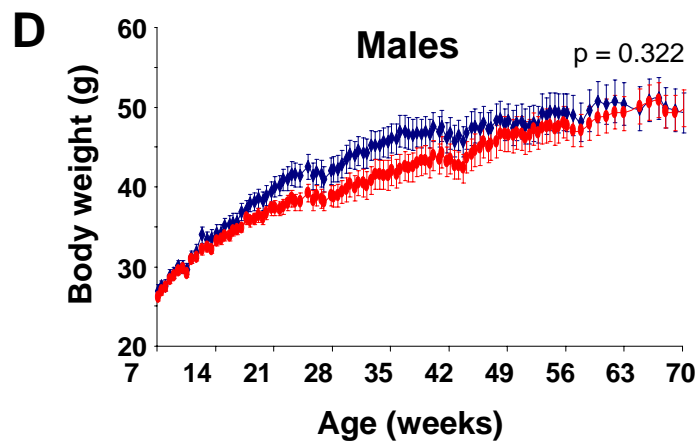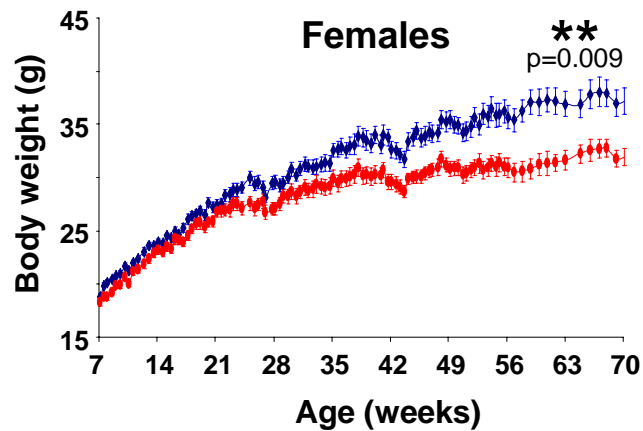

Supplement: pnas_0712324105_2.pdf [file pnas_0712324105_2.pdf]

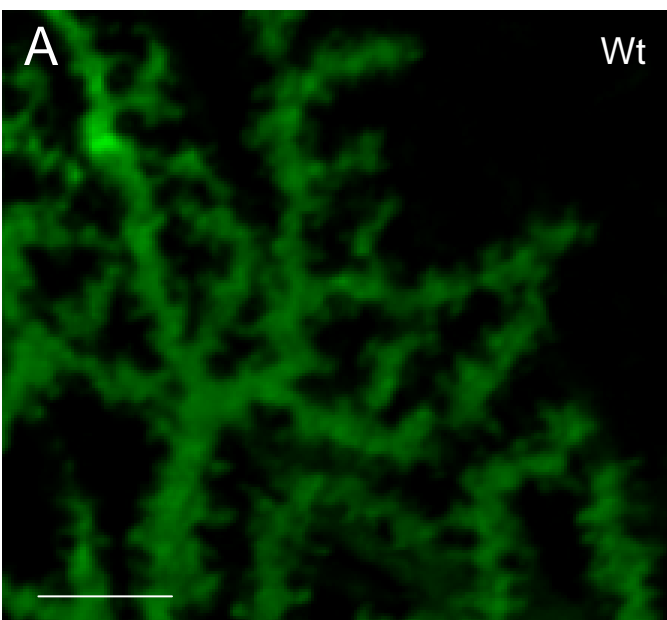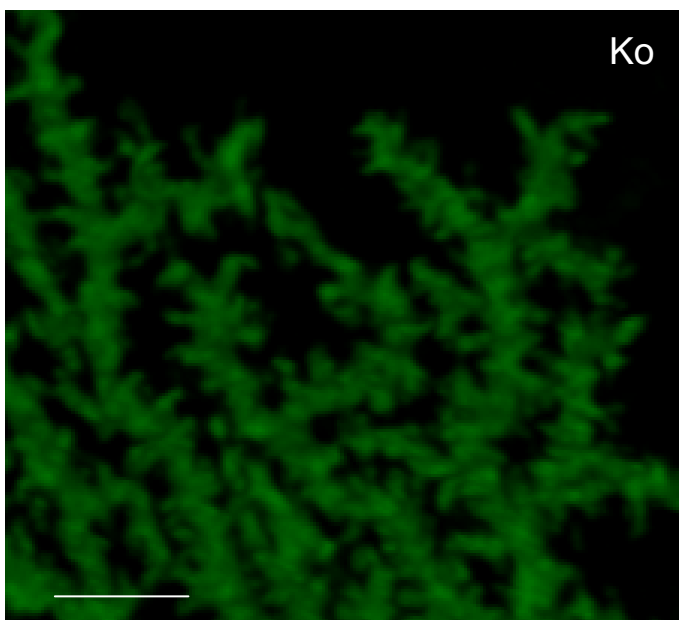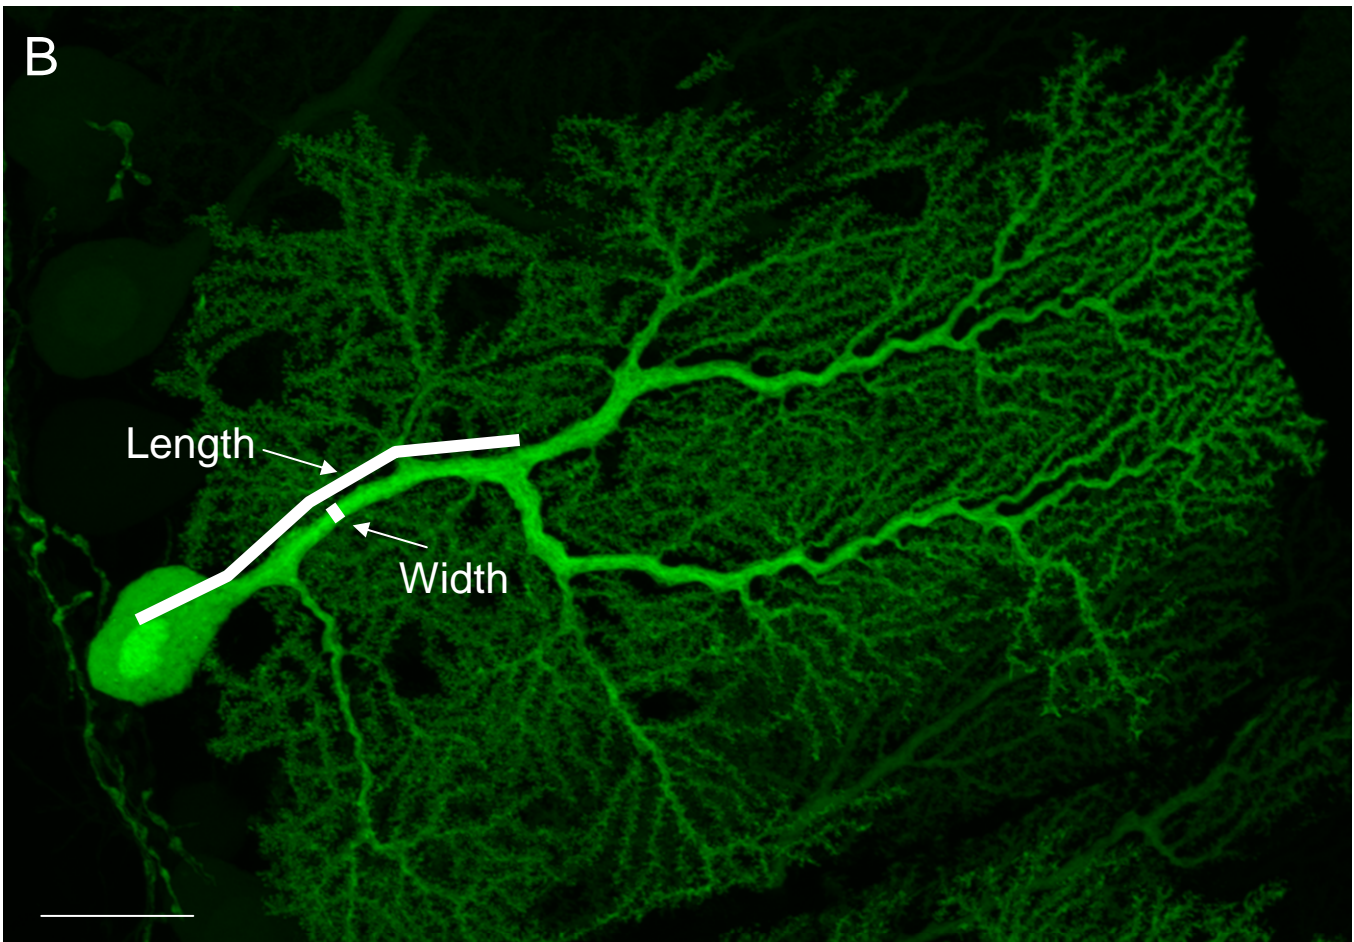

Supplement: pnas_0712324105_4.pdf [file pnas_0712324105_4.pdf]

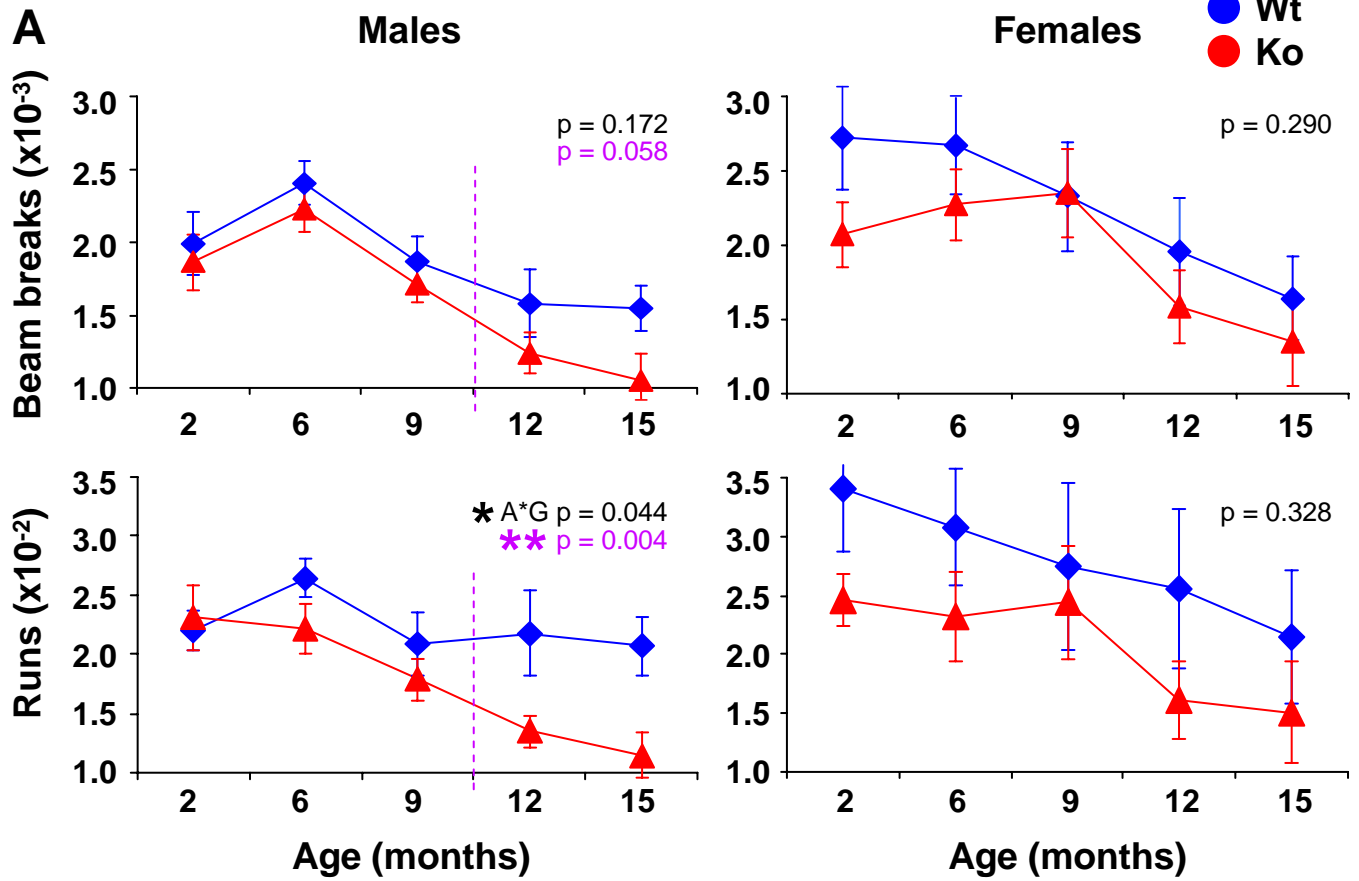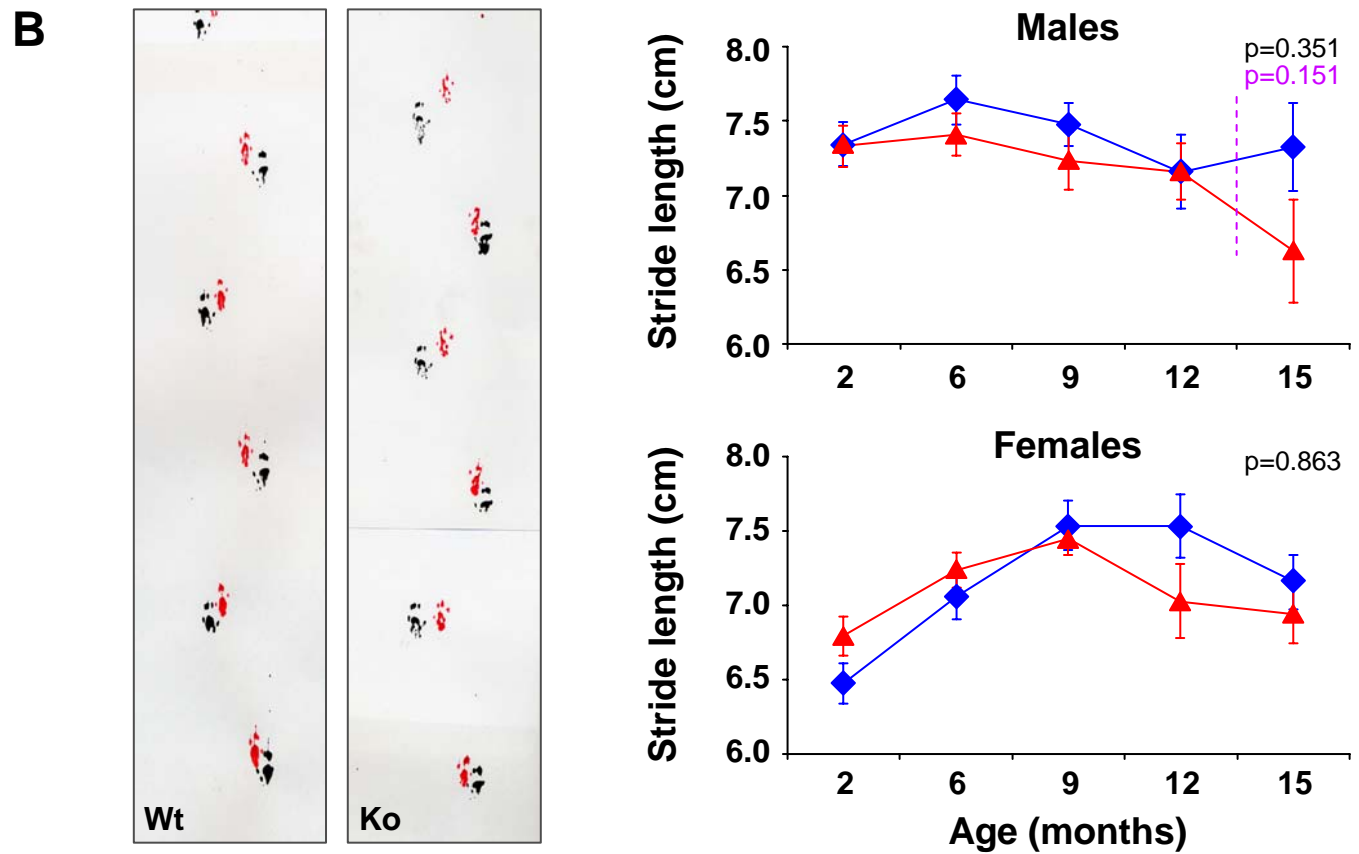

Supplement: pnas_0712324105_5.pdf [file pnas_0712324105_5.pdf]

**A**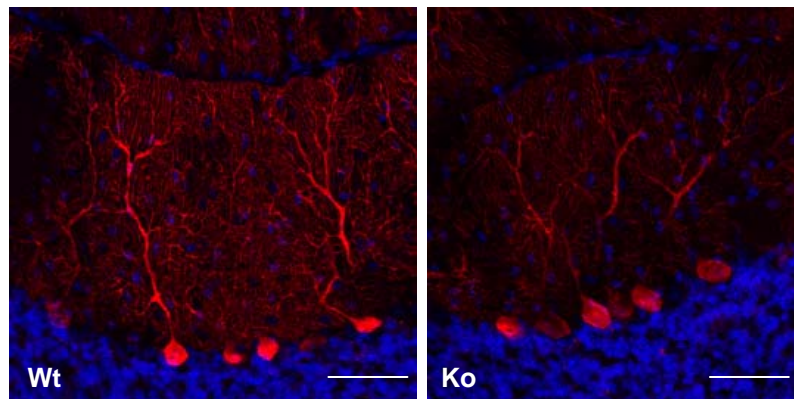

Purkinje cells with  
visible dendritic trunks  
in the plane of focus (%)

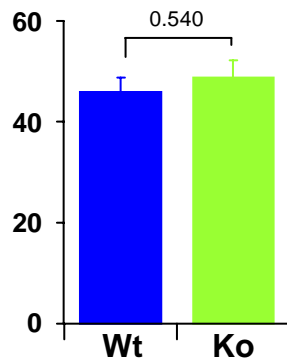**B**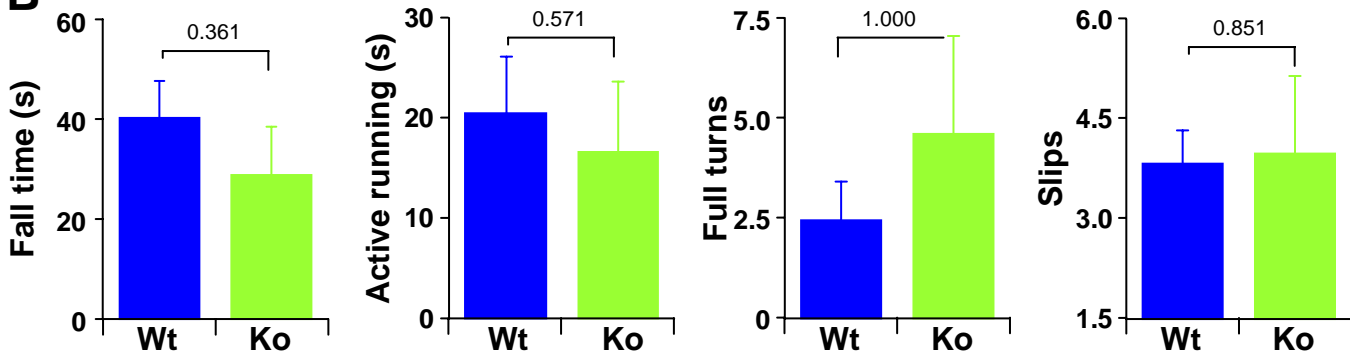**C**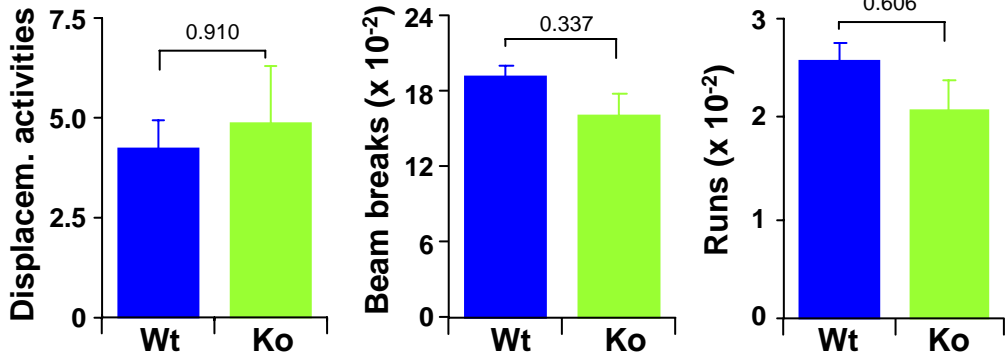**D**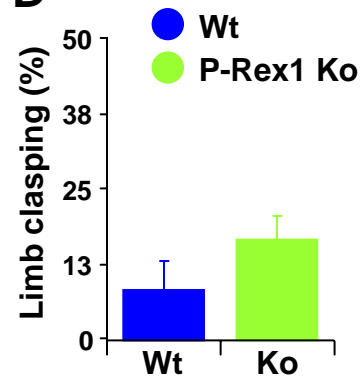

Supplement: pnas_0712324105_7.pdf [file pnas_0712324105_7.pdf]

**A**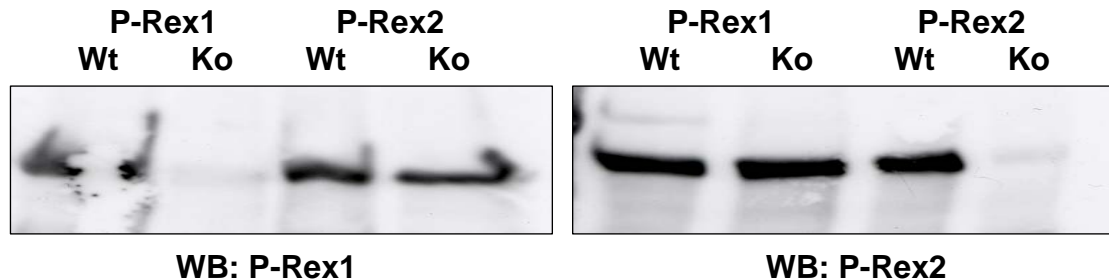**B**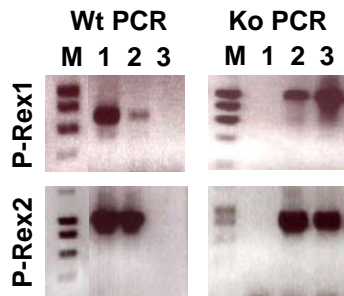**C**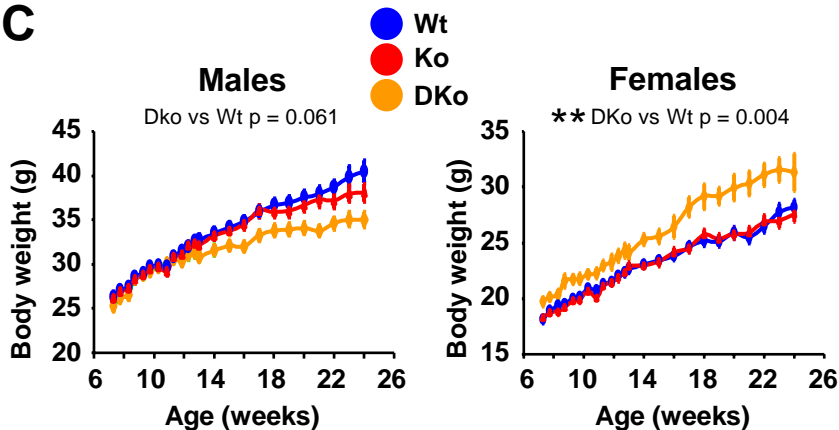

Supplement: pnas_0712324105_8.pdf [file pnas_0712324105_8.pdf]
